# Supplementary material for: The Landscape of the DNA Transposons in the Genome of the Horezu_LaPeri Strain of Drosophila melanogaster
Source: MDPI journal article supplement (doi:10.3390/insects14060494), 2023-05-25
Supplement: s1 [file s1]

**Supplementary Table S3.** The total number of P-element insertions having both ends (TIRs) and intact TSDs identified in the Horezu\_LaPeri genome using GA\_v2.

| Assembly_contig ID | Chromosome | Genomic coordinate | Hit/Nearby Genes/NTs                 | NT Orientation | TSD      |
|--------------------|------------|--------------------|--------------------------------------|----------------|----------|
| Canu_491           | 3L         | 21,347,168         | <i>ebd2</i> ,<br>CG32436<br>intronic | +              | GTTCCGCT |
| Canu_869           | X          | 10,547,695         | <i>pri</i><br>intronic               | +              | GGAGAGCC |
| Canu_1601          | 3L         | 3,250,477          | <i>lncRNA:</i><br>CR43626            | -              | GCTCAAAT |
| Canu_1937          | 3L         | 959,438            | <i>Glut1</i><br>intronic             | +              | CTTGGAAC |
| Canu_1938          | 3L         | 1,688,826          | CG7991<br>exonic                     | -              | CGCCGTCC |
| Canu_2082          | 2L         | 21,697,891         | <i>nolo</i><br>intronic              | +              | ACTCGGGG |
| Canu_2967          | 3R         | 19,180,631         | close to<br>CG5555,<br>CG31475       | -              | GTTTGGAT |
| Canu_3114          | X          | 11,201,707         | gipsy5{}103                          | -              | CGCCAGTG |
| CanuAlt_3182       | 3L         | 14,410,404         | <i>lncRNA:</i><br>CR45233            | +              | GTCTGGCA |
| CanuAlt_3419       | 2R         | 12,188,531         | <i>Cyp6g2</i><br>exonic              | -              | GTCTAGAC |
| FlyeAlt_1148       | 2R         | 23,635,173         | <i>retn</i><br>intronic              | -              | GTCCATGG |
| FlyeAlt_1188       | X          | 15,552,365         | <i>Ac13E</i><br>intronic             | +              | GTATGAGC |
| FlyeAlt_1736       | 3L         | 13,477,235         | close to <i>stv</i>                  | -              | GTCTGATG |
| FlyeAlt_1795       | X          | 17,562,651         | close to<br>CG43658                  | -              | CGCCAGCT |
| FlyeAlt_2153       | X          | 13,641,922         | <i>NFAT</i><br>intronic              | -              | GGCCACGC |
