# Supplementary material for: The Landscape of the DNA Transposons in the Genome of the Horezu_LaPeri Strain of Drosophila melanogaster
Source: MDPI journal article supplement (doi:10.3390/insects14060494), 2023-05-25
Supplement: s1 [file s1]

**Supplementary Table S4.** New insertions identified using LoRTE v1.2 in nanopore reads of Horezu\_LaPeri genome.

| RepBaseID#Type/Family        | Coverage | Genomic coordinates         | Genomic region                                  | Percentage of covered NT | Percentage of polymorph | Number of deletion |
|------------------------------|----------|-----------------------------|-------------------------------------------------|--------------------------|-------------------------|--------------------|
| DM176_LTR#LTR/Gypsy          | 10       | 2R:7,606,220..<br>7,606,623 | CG1358<br>intron                                | 99.95                    | 2.93                    | 568                |
| M4DM#DNA/CMC-<br>Transib     | 13       | 2L:20,969,629..20,970,029   | CG42238<br>intron                               |                          |                         |                    |
| TRANSIB2#DNA/CMC-<br>Transib | 7        | 3R:14,049,171..14,049,575   | noncoding<br>region                             |                          |                         |                    |
| LINEJ1_DM#LINE/Jockey        | 1        | 2L:15,257,737..15,258,141   | <i>yuri</i><br>exon                             |                          |                         |                    |
| LINEJ1_DM#LINE/Jockey        | 1        | 3R:22,199,769..22,200,183   | <i>SKIP</i> intron and<br><i>lncRNA:CR45224</i> |                          |                         |                    |
| M4DM#DNA/CMC-<br>Transib     | 4        | X:18,356,645..18,357,047    | INE-1{}4916                                     |                          |                         |                    |
| Jockey-<br>4_DAn#LINE/Jockey | 1        | 3R:31,536,097..31,536,508   | noncoding<br>region                             |                          |                         |                    |
