# Supplementary material for: The Landscape of the DNA Transposons in the Genome of the Horezu_LaPeri Strain of Drosophila melanogaster
Source: MDPI journal article supplement (doi:10.3390/insects14060494), 2023-05-25
Supplement: s1 [file s1]

**Supplementary Table S2.** Conserved DNA NTs insertions identified in the Horezu\_LaPeri genome using Genome ARTIST\_v2 and the reference genome of *D. melanogaster* r6.48. The annotated insertions are mentioned by their FlyBase identifier of the transposable element, while the unannotated insertions are mentioned by the coordinate where the NT is located. Insertions marked with an asterisk (\*) stand for NTs located in heterochromatic regions.

| NT name      | Contig number                                  | Insertion coordinate; host chromosome               | Hit/Nearby Genes/NTs                                     | FlyBase annotation |
|--------------|------------------------------------------------|-----------------------------------------------------|----------------------------------------------------------|--------------------|
| <b>Bari1</b> | 595                                            | Bari1{}Jheh <sup>Bari1855</sup> ; 2R                | <i>asRNA:CR46485</i> and close to <i>Jheh2</i>           | Yes                |
|              | 1117, 2174, 2175, 2176, 2177, 2467, 2468, 2469 | Bari1 cluster from h39 region; 2R: 180,603..287,454 | -                                                        | No                 |
|              | 2099                                           | Bari1 cluster; X                                    | close to <i>28SrRNA:Ψ:CR45855*</i>                       | No                 |
|              | 2280, 2281, 2966, 2967                         | Bari1{}Cyp12a4 <sup>Bari1-1386</sup> ; 3R           | close to <i>Cyp12a4</i> , <i>Cyp12a5</i> and <i>Ppcs</i> | Yes                |
|              | 3003                                           |                                                     | Most probably in 2R                                      |                    |
|              | 3469                                           |                                                     | Unresolvable                                             |                    |
| <b>Bari2</b> | 284, 1991                                      | Bari2{}506; 2L                                      | <i>nompB</i>                                             | Yes                |
|              | 331                                            | Bari2{}1537; 4                                      | <i>unc-13</i>                                            | Yes                |
|              | 711                                            | 22,570,232; X                                       | -*                                                       | No                 |
|              | 808                                            | 4,804,322; 2R                                       | <i>lncRNA:CR46477*</i> NTs hotspot                       | No                 |
| <b>HB</b>    | 253                                            | HB{}1517; 4                                         | <i>zfh2</i> NTs hotspot                                  | Yes                |
|              | 294                                            | HB{}3970; HB{}3969; 3L                              | -                                                        | Yes                |
|              | 331                                            | HB{}1548; 4                                         | <i>PlexA</i> NTs hotspot                                 | Yes                |
|              |                                                | HB{}1552; 4                                         | <i>apolpp</i>                                            | Yes                |
|              |                                                | HB{}1535; 4                                         | NTs hotspot                                              | Yes                |
|              | 407, 2076, 2183                                | 2918837; 2R                                         | -*                                                       | No                 |
|              | 506, 2183                                      | HB{}1194; 3R                                        | <i>CG34357</i>                                           | Yes                |
|              | 511                                            | HB{}761; 2R                                         | -                                                        | Yes                |
|              | 586                                            | HB{}1219; 3R                                        | <i>Cerk</i>                                              | Yes                |
|              | 616, 3208                                      | HB{}1831; 3R                                        | close to <i>Nlg3</i>                                     | Yes                |
|              | 646                                            | 24,251,060; 3L                                      | <i>Snap25*</i>                                           | No                 |
|              | 711                                            | HB{}276; X                                          | <i>fog*</i> , <i>CG42346*</i>                            | Yes                |
|              |                                                | HB{}3716; X                                         | <i>lncRNA:CR44997*</i>                                   | Yes                |
|              | 773, 2613                                      | HB{}1155; HB{}1151; 3L                              | NTs hotspot*                                             | Yes                |
|              | 808, 2940                                      | HB{}5077; 2R                                        | close to <i>conu*</i> NTs hotspot                        | Yes                |
|              | 1048                                           | HB{}1242; 3R                                        | <i>Fer1</i>                                              | Yes                |
|              | 1099                                           | HB{}86; X                                           | <i>CG15347</i>                                           | Yes                |

|      |                |                |                                                                    |     |
|------|----------------|----------------|--------------------------------------------------------------------|-----|
|      | 1140           | HB{}3068; X    | <i>hiw</i>                                                         | Yes |
|      | 1238           | HB{}248; X     | <i>Usp2*</i>                                                       | Yes |
|      | 1371           | HB{}134; X     | <i>hiw</i> , CG5541                                                | Yes |
|      | 1724           | 27,150,425; 3L | <i>vtd*</i>                                                        | No  |
|      | 1771           | HB{}227; X     | <i>DIP1*</i>                                                       | Yes |
|      | 1989           | HB{}482; 2L    | close to <i>del</i>                                                | Yes |
|      |                | HB{}512; 2L    | CG2225                                                             | Yes |
|      | 1991           | HB{}519; 2L    | <i>.*</i>                                                          | Yes |
|      |                | HB{}2269; 2L   | close to <i>eEF2</i>                                               | Yes |
|      |                | HB{}5495; 2L   | close to <i>tsh*</i>                                               | Yes |
|      | 1993           | HB{}529; 2L    | <i>lncRNA:CR46480*</i><br>NTs hotspot                              | Yes |
|      |                | HB{}524; 2L    | NTs hotspot*                                                       | Yes |
|      | 2047           | HB{}1183; 3R   | CR33294*                                                           | Yes |
|      | 2047, 2048     | HB{}1185; 3R   | <i>aux</i>                                                         | Yes |
|      | 2142           | 27,538,935; 3L | <i>.*</i>                                                          | No  |
|      | 2322           | HB{}1605; 3R   | <i>heph</i>                                                        | Yes |
|      | 2555           | HB{}674; 2R    | <i>Ugt50B3*</i><br>NTs hotspot                                     | Yes |
|      | 2658           | 4,461,263; 2R  | <i>Gprk1*</i>                                                      | No  |
|      | 2661           | 4,200,622; 2R  | <i>.*</i>                                                          | No  |
|      | 2675           | HB{}2180; 3L   | close to CG7133                                                    | Yes |
|      | 2724           | 2,774,587; 2R  | CG41378*                                                           | No  |
|      | 2831           | 26,229,932; 3L | close to CG40160*                                                  | No  |
|      | 2904           | 1,735,440; 2R  | CG41520*                                                           | No  |
|      | 3024           | 3,467,608; 2R  | close to CR45227*                                                  | No  |
|      | 3029           |                | Unresolvable                                                       |     |
|      | 3138           | HB{}703; 2R    | NTs hotspot*                                                       | Yes |
|      |                | HB{}887; 2R    | <i>lov</i>                                                         | Yes |
|      | 3500           | HB{}892; 2R    | close to <i>Ebp</i>                                                | Yes |
| hobo | 460            | 25,849,868; 3L | <i>l(3)80Fg*</i>                                                   | No  |
|      | 482, 512, 2183 | H{}4523; 3R    | -                                                                  | Yes |
|      | 2024           | 22,465,193; 2R | CG10384                                                            | No  |
|      | 2123           | 12,300,267; 3L | -                                                                  | No  |
|      | 2229           | 13,677,674; 2R | <i>tei</i>                                                         | No  |
|      | 2279           | H{}4815; 3R    | -                                                                  | Yes |
|      | 2654           | 943,071; 3R    | <i>Myo81F*</i>                                                     | No  |
|      | 2719           | H{}2157; X     | <i>.*</i>                                                          | Yes |
|      | 2908           | 2,628,132; 3R  | <i>Pzl*</i>                                                        | No  |
|      | 3135           | 24,775,148; 3L | <i>.*</i>                                                          | No  |
|      | 3172           | 2,495,671; 2R  | <i>.*</i>                                                          | No  |
|      | 3451           | 12,090,664; X  | <i>lncRNA:CR43960</i> ,<br><i>Ten-a</i> ,<br><i>lncRNA:CR32658</i> | No  |

|          |                                   |                    |                                       |     |
|----------|-----------------------------------|--------------------|---------------------------------------|-----|
| hopper   | 11, 1981                          | 694,545; Y         | -*                                    | No  |
|          | 407, 2076                         | 2,918,417; 2R      | -*                                    | No  |
|          | 474, 2401                         | 27,327,694; 3L     | <i>Dbp80*</i>                         | No  |
|          | 564, 2163                         | 2,311,266; 2R      | -*                                    | No  |
|          | 744                               | 2,906,148; 3R      | <i>Pzl*</i>                           | No  |
|          | 800, 2507                         | 1,638,912; 2R      | -*                                    | No  |
|          | 874                               | hopper{}643; 2R    | <i>sxc*</i><br>NTs hotspot            | Yes |
|          | 892                               | hopper{}36; X      | <i>lncRNA:CR44999</i>                 | Yes |
|          | 898, 2992                         | 24,147,270; 3L     | <i>Snap25*</i>                        | No  |
|          | 908                               | hopper{}1210; 3R   | <i>atms, CG44098</i>                  | Yes |
|          | 910                               | hopper{}634; 2R    | <i>Nipped-A*</i><br>NTs hotspot       | Yes |
|          | 962                               | 590,754; 2R        | <i>DIP-λ*</i>                         | No  |
|          | 1011                              | hopper{}6535; 3R   | <i>Myo81F*</i>                        | Yes |
|          | 1178                              | hopper{}105; X     | <i>CG44422</i>                        | Yes |
|          | 2155                              | hopper{}1031; 3L   | NTs hotspot                           | Yes |
|          | 2308                              | 2,050,704; 2R      | <i>CG17684*</i>                       | No  |
|          | 2371                              | 1,464,035; 2R      | -*                                    | No  |
|          | 2374                              | 1,263,557; 2R      | <i>CG40191*</i>                       | No  |
|          | 2461                              | hopper{}6534; 3L   | -*                                    | Yes |
|          | 2613                              | hopper{}1181; 3L   | <i>CG34031*</i><br>NTs hotspot        | Yes |
|          | 2631                              | 26,844,390; 3L     | -*                                    | No  |
|          | 2908, 3375                        | 2,668,075; 3R      | <i>Pzl*</i>                           | No  |
|          | 3103                              | Unresolvable       |                                       |     |
|          | 3265                              | 1,273,068; 3R      | <i>Myo81F*</i>                        | No  |
|          | 3602                              | hopper{}4661; 2L   | -                                     | Yes |
|          |                                   | hopper{}4688; 2L   | -                                     | Yes |
|          | 3769                              | hopper{}4663; 2L   | -                                     | Yes |
| mariner2 | 73, 1993                          | mariner2{}1651; 2L | <i>Marf1*</i><br>NTs hotspot          | Yes |
|          | 329, 2723                         | 2,793,469; 2R      | <i>CG41378*</i>                       | No  |
|          | 332, 2114                         | mariner2{}1523; 4  | close to <i>gw</i>                    | Yes |
|          | 460                               | 25,845,385; 3L     | <i>l(3)80Fg*</i>                      | No  |
|          | 583, 2011                         | mariner2{}1819; 3L | NTs hotspot*                          | Yes |
|          | 589, 2906, 2907, 3013, 3213, 3214 | 3,070,964; 2R      | <i>dpr21*</i>                         | No  |
|          | 711                               | mariner2{}274; X   | <i>lncRNA:CR44997*</i><br>NTs hotspot | Yes |
|          |                                   | mariner2{}3718; X  | -*                                    | Yes |
|          | 759                               | 2,652,263; 3R      | <i>Pzl*</i>                           | No  |
|          | 808                               | mariner2{}5092; 2R | <i>lncRNA:CR46477*</i>                | Yes |
|          | 1118, 1992                        | mariner2{}522; 2L  | NTs hotspot*                          | Yes |

|           |                  |                    |                                           |     |
|-----------|------------------|--------------------|-------------------------------------------|-----|
|           | 1153             | mariner2{}198; X   | -                                         | Yes |
|           | 1155             | mariner2{}225; X   | .*                                        | Yes |
|           | 1264             | mariner2{}252; X   | CG17600*, INE-1{}2444                     | Yes |
|           | 1611             | mariner2{}3947; 3L | close to CG33217*                         | Yes |
|           | 1991             | mariner2{}513; 2L  | <i>nolo</i>                               | Yes |
|           | 2011             | mariner2{}1821; 3L | AGO3*                                     | Yes |
|           | 2076             | 2,948,288; 2R      | <i>Sep1</i>                               | No  |
|           | 2114             | mariner2{}1522; 4  | <i>Ekar</i><br>NTs hotspot                | Yes |
|           | 2142             | 27,856,259; 3L     | <i>eIF4B*</i> ,<br><i>lncRNA:CR46482*</i> | No  |
|           | 2287             | mariner2{}628; 2R  | <i>Nipped-A*</i>                          | Yes |
|           | 2298             | 3,469,757; 3R      | <i>Parp*</i>                              | No  |
|           | 2308             | 2,109,132; 2R      | CG17684*                                  | No  |
|           | 2613             | mariner2{}1130; 3L | NTs hotspot*                              | Yes |
|           | 2614             | mariner2{}1115; 3L | NTs hotspot*                              | Yes |
|           | 2616             | mariner2{}767; 2R  | <i>Glo1</i><br>NTs hotspot                | Yes |
|           | 2658, 2659, 2739 | 4,425,204; 2R      | <i>Gprk1*</i>                             | No  |
|           | 2664             | 3,931,953; 2R      | <i>uex*</i>                               | No  |
|           | 2724             | 2,678,501; 2R      | .*                                        | No  |
|           | 2752, 3472       | 3,287,197; 2R      | .*                                        | No  |
|           | 2904             | 1,777,959; 2R      | CG41520*                                  | No  |
|           | 2908             | 2,671,981; 3R      | <i>Pzl*</i>                               | No  |
|           | 3368             | 558,088; 3R        | .*                                        | No  |
|           | 3565             | 23,042,079; X      | CG12061*                                  | No  |
| NOF       | 578              | 3,123,108; 3R      | <i>Pzl*</i>                               | No  |
|           | 2394             | NOF{}1401; 3R      | -                                         | Yes |
| pogo      | 817, 990         |                    | Unresolvable                              |     |
|           | 1962             | pogo{}895; 3L      | -                                         | Yes |
|           | 1990             | pogo{}4759; 2L     | -                                         | Yes |
|           | 2637             |                    | Most probably in X                        |     |
|           | 2719, 3249, 3445 |                    | Unresolvable                              |     |
|           | 3602             | pogo{}433; 2L      | -                                         | Yes |
|           | 3835             | pogo{}6553; 3L     | .*                                        | Yes |
|           |                  |                    |                                           |     |
| S-element | 202, 2401        | 27,387,339; 3L     | <i>Dbp80*</i>                             | No  |
|           | 202              | 27,395,632; 3L     | <i>Dbp80*</i>                             | No  |
|           | 219, 2353        | 3,750,087; 3R      | close to CG41128*                         | No  |
|           | 219              | 3,749,248; 3R      | close to 1360{}6424*                      | No  |
|           | 222              | S{}AGO2[S1008]; 3L | AGO2                                      | Yes |
|           | 253, 2454        | S{}1513; 4         | -                                         | Yes |
|           | 286              | 25,610,028; 3L     | <i>lovit*</i>                             | No  |

|                 |                |                               |     |
|-----------------|----------------|-------------------------------|-----|
| 455             | 25,738,461; 3L | close to 17.6{}6492*          | No  |
| 455, 2952       | 25,733,788; 3L | _*                            | No  |
| 469, 2990, 2991 | 27,281,198; 3L | <i>Dbp80*</i>                 | No  |
| 511             | S{}758; 2R     | <i>Adf1</i>                   | Yes |
| 529, 2310       | S{}746; 2R     | -                             | Yes |
| 586             | S{}1217; 3R    | <i>Tim17a2, Hph</i>           | Yes |
| 646             | 24,325,461; 3L | close to <i>nvd*</i>          | No  |
| 711             | S{}260; X      | _*                            | Yes |
| 744             | 2,682,905; 3R  | <i>Pzl*</i>                   | No  |
| 773             |                | Unresolvable                  |     |
| 871             | 852,569; 3R    | <i>Myo81F*</i>                | No  |
|                 | 861,086; 3R    | <i>Myo81F*</i>                | No  |
| 874             | S{}652; 2R     | _*                            | Yes |
| 881             | S{}3280; 2R    | _*                            | Yes |
| 908             | S{}1207; 3R    | <i>smash</i>                  | Yes |
|                 | S{}1208; 3R    | -                             | Yes |
| 941             | S{}135; X      | -                             | Yes |
| 1011            | 1,343,654; 3R  | <i>Myo81F*</i>                | No  |
|                 | 1,300,818; 3R  | <i>Myo81F*</i>                | No  |
| 1153            | S{}195; X      | <i>CG15446</i><br><i>stg1</i> | Yes |
| 1264            | S{}1647; X     | _*                            | Yes |
|                 | S{}3184; X     | _*                            | Yes |
| 1602            | S{}1026; 3L    | <i>NUCB1</i>                  | Yes |
| 1616            |                | Unresolvable                  |     |
| 1933            | 1,526,163; 2R  | <i>Maf1*</i>                  | No  |
|                 | 1,529,938; 2R  | _*                            | No  |
| 1960            |                | Unresolvable                  |     |
| 1968, 1985      | S{}1347; 3R    | -                             | Yes |
|                 | S{}4761; 3R    | -                             | Yes |
| 1991            | S{}4784; 2L    | <i>Max{}4867</i>              | Yes |
| 1993            | S{}532; 2L     | <i>CG42748*</i>               | Yes |
|                 | S{}533; 2L     | <i>CG42748*</i>               | Yes |
| 2011            | S{}5868; 3L    | <i>AGO3*</i><br>NTs hotspot   | Yes |
| 2019, 2483      | S{}1448; 3R    | <i>CG14518</i>                | Yes |
| 2052            | 1,642,861; 3R  | <i>Myo81F*</i>                | No  |
|                 | 1,694,280; 3R  | <i>Myo81F*</i>                | No  |
| 2116            | 2,421,564; 3R  | <i>Myo81F*</i>                | No  |
| 2155            | S{}1035; 3L    | -                             | Yes |
| 2172            | S{}1237; 3R    | -                             | Yes |
| 2173            | 322,894; 2R    | close to <i>DIP-λ*</i>        | No  |
| 2183            | S{}1196; 3R    | <i>CG34357</i><br>NTs hotspot | Yes |

|                  |                |                                    |     |
|------------------|----------------|------------------------------------|-----|
|                  | S{}3902; 3R    | -                                  | Yes |
| 2225             | 693,800; 2R    | <i>DIP-λ*</i>                      | No  |
| 2252             |                | Unresolvable                       |     |
| 2290             | S{}312; 2L     | <i>stai</i>                        | Yes |
| 2308             | 2,092,186; 2R  | <i>CG17684*</i>                    | No  |
| 2353             | 3,792,255; 3R  | _*                                 | No  |
| 2430             | 2,195,782; 2R  | <i>CG17684*</i>                    | No  |
| 2454             | S{}1511; 4     | NTs hotspot                        | Yes |
| 2490, 3534, 3535 | 23,375,679; X  | _*                                 | No  |
| 2494             |                | Unresolvable                       |     |
| 2507             | 1,590,098; 2R  | close to <i>CG17691*</i>           | No  |
| 2537             |                | Unresolvable                       |     |
| 2571             | 23,351,597; X  | _*                                 | No  |
| 2579             |                | Most probably in Y                 |     |
| 2596             | 25,414,450; 3L | <i>lovit*</i>                      | No  |
|                  | S{}1150; 3L    | _*                                 | Yes |
|                  | S{}1156; 3L    | _*                                 | Yes |
| 2613             | S{}1121; 3L    | <i>CklIIalpha*</i><br>NTs hotspot  | Yes |
| 2654             | 942,968; 3R    | <i>Myo81F*</i>                     | No  |
|                  | 4,468,942; 2R  | <i>Gprk1*</i>                      | No  |
| 2658             | 4,461,891; 2R  | <i>Gprk1*</i>                      | No  |
| 2692             |                | Unresolvable                       |     |
| 2789             | S{}1355; 3R    | -                                  | Yes |
| 2812             | 4,057,226; 3R  | _*                                 | No  |
| 2873             | 1,155,538; 3R  | <i>Myo81F*</i>                     | No  |
| 2908, 2909       | 2,684,623; 3R  | <i>Pzl*</i>                        | No  |
| 2915, 2944       |                | Unresolvable                       |     |
| 3029             | S{}6581; Y     | _*                                 | Yes |
| 3164, 3168       |                | Unresolvable                       |     |
| 3243             | 27,086,583; 3L | close to <i>CG40228*</i>           | No  |
| 3293             | 31,671; Y      | <i>kl-5*</i>                       | No  |
|                  |                | <i>stw*</i>                        |     |
| 3306             | S{}665; 2R     | NTs hotspot                        | Yes |
| 3347             | 23,915,527; 3L | <i>CG40470*</i>                    | No  |
| 3368             | 611,450; 3R    | <i>Myo81F*</i>                     | No  |
| 3395             |                | Unresolvable                       |     |
| 3396, 3534       | 23,355,679; X  | _*                                 | No  |
| 3602             | S{}447; 2L     | NTs hotspot                        | Yes |
| 3703             |                | Most probably in 2R                |     |
| 758              |                | Unresolvable                       |     |
| 871              | 833,034; 3R    | <i>Myo81F*</i>                     | No  |
| 1380             | S2{}249; X     | close to<br><i>invader1{}3257,</i> | Yes |

|     |                              |                |                                                           |     |
|-----|------------------------------|----------------|-----------------------------------------------------------|-----|
| Tc1 | CG14613*, CG12576*,<br>Usp2* |                |                                                           |     |
|     | 1989                         | S2{}491; 2L    | close to G5{}492, <i>nrv3</i><br>NTs hotspot              | Yes |
|     | 2076                         | 2,961,468; 2R  | <i>Scp1</i> *                                             | No  |
|     | 2116                         | 2,476,278; 3R  | <i>Myo81F</i> *                                           | No  |
|     | 2183                         | S2{}1200; 3R   | NTs hotspot                                               | Yes |
|     | 2264                         |                | Unresolvable                                              |     |
|     | 2280                         | S2{}1385; 3R   | <i>Xrp1</i>                                               | Yes |
|     | 2308                         | 2,054,988; 2R  | CG17684*                                                  | Yes |
|     | 2553                         | S2{}1710; 2R   | <i>Ir41a</i> *<br>NTs hotspot                             | Yes |
|     | 2613                         | S2{}1120; 3L   | <i>CkIIalpha</i> *<br>close to S{}1121,<br><i>RpL10</i> * | Yes |
|     |                              | S2{}1172; 3L   | <i>nAChRα4</i> *<br>NTs hotspot                           | Yes |
|     | 2664                         | 3,904,119; 2R  | <i>uex</i> *<br>close to 1360{}6353                       | No  |
|     | 2812                         | 4,077,592; 3R  | close to CG42402*                                         | No  |
|     | 2832                         | S2{}6583; 3L   | -*                                                        | Yes |
|     |                              | S2{}6582; 3L   | <i>l(3)80Fg</i> *                                         | Yes |
|     | 2875, 2876                   | 1,065,890; 3R  | <i>Myo81F</i> *                                           | Yes |
|     | 11, 1981                     | 691,853; Y     | -*                                                        | No  |
|     | 185                          |                | Unresolvable                                              |     |
|     | 219, 2353                    | 3,746,649; 3R  | 1360{}6424*                                               | No  |
|     | 263                          | Tc1{}617; 2R   | NTs hotspot*                                              | Yes |
|     | 289, 2661                    | 4,165,977; 2R  | -*                                                        | No  |
|     | 331                          | Tc1{}1544; 4   | -                                                         | Yes |
|     |                              | Tc1{}1549; 4   | <i>PlexA</i>                                              | Yes |
|     |                              | Tc1{}1550; 4   | <i>CamKII</i><br>NTs hotspot                              | Yes |
|     | 331, 2306                    | Tc1{}1556; 4   | <i>Kif3C</i>                                              | Yes |
|     |                              | Tc1{}1557; 4   | <i>Kif3C</i>                                              | Yes |
|     | 333                          | Tc1{}1211; 3R  | close to CG14658<br>and CG14659                           | Yes |
|     | 521, 539, 1883, 2372         | Tc1{}6593; 2R  | <i>Yeti</i> *                                             | Yes |
|     | 521, 539, 2372               | Tc1{}6594; 2R  | -*                                                        | Yes |
|     | 539, 2372                    | 1,284,699; 2R  | -*                                                        | No  |
|     | 586                          | Tc1{}1216; 3R  | <i>dpr16</i>                                              | Yes |
|     | 711                          | Tc1{}4352; X   | NTs hotspot*                                              | Yes |
|     | 714, 715                     | 24,072,383; 3L | close to <i>Snap25</i> *                                  | No  |
|     | 714                          | 24,033,292; 3L | CG40045*                                                  | No  |
|     | 756                          | 26,816,906; 3L | -*                                                        | No  |
|     | 790, 2887, 3137              | 24,922,073; 3L | -*                                                        | No  |

|                 |                        |                    |                                               |     |
|-----------------|------------------------|--------------------|-----------------------------------------------|-----|
|                 | 798                    | 188,717; Y         | <i>PRY*</i>                                   | No  |
|                 | 874                    | Tc1{}641; 2R       | close to <i>sxc*</i><br>NTs hotspot           | Yes |
|                 | 993                    | 3,023,693; 3R      | <i>Pzl*</i>                                   | No  |
|                 | 1246                   | Tc1{}4353; X       | close to <i>Coa7*</i>                         | Yes |
|                 | 1464                   | Tc1{}172; X        | close to <i>Cdc42</i>                         | Yes |
|                 | 1883                   | 1,285,426; 2R      | <i>-*</i>                                     | No  |
|                 | 2111                   | Tc1{}826; 2R       | close to <i>RpS23</i> and<br><i>CG8468</i>    | Yes |
|                 |                        | Tc1{}1529; 4       | <i>bt</i>                                     | Yes |
|                 | 2114                   | Tc1{}1531; 4       | <i>MED26</i><br>NTs hotspot                   | Yes |
|                 |                        | Tc1{}1633; 4       | <i>CG11360</i><br>NTs hotspot                 | Yes |
|                 | 2166                   | Tc1{}403; 2L       | close to <i>CG44476</i> and<br><i>CG15152</i> | Yes |
|                 | 2372                   | 1,076,978; 2R      | <i>rl*</i>                                    | No  |
|                 | 2455                   | Tc1{}1485; 4       | <i>Ank</i><br>NTs hotspot                     | Yes |
|                 |                        | Tc1{}1500; 4       | <i>Syt7</i>                                   | Yes |
|                 | 2459                   | Tc1{}6596; 3L      | <i>-*</i>                                     | Yes |
|                 |                        | 26,566,093; 3L     | <i>-*</i>                                     | No  |
|                 | 2478                   |                    | Unresolvable                                  |     |
|                 | 2599, 2932, 2933, 2985 | 23,178,990; 2L     | <i>-*</i>                                     | No  |
|                 | 2830, 2831, 3471       | Tc1{}6595; 3L      | <i>CG41284*</i>                               | Yes |
|                 | 2905                   | 3,130,514; 2R      | <i>dpr21*</i>                                 | No  |
|                 | 2942                   | Tc1{}5005; 2R      | <i>Nipped-B*</i><br>NTs hotspot               | Yes |
|                 | 2986                   |                    | Unresolvable                                  |     |
|                 | 2994                   | Tc1{}5901; 3L      | <i>AGO3*</i><br>NTs hotspot                   | Yes |
|                 | 3011                   | Tc1{}1080; 3L      | close to <i>CG5664</i>                        | Yes |
|                 | 3306                   | Tc1{}663; 2R       | close to <i>stw*</i>                          | Yes |
|                 | 3565                   | Tc1{}6597; X       | <i>CG12061*</i>                               | Yes |
| <b>Tc3</b>      | 333                    | Tc3{}5089; 3R      | <i>Cdep</i>                                   | Yes |
|                 | 482, 512               | Tc3{}5024; 3R      | -                                             | Yes |
|                 | 714                    | 24,088,971; 3L     | <i>Snap25*</i>                                | No  |
|                 | 1494                   | 502,195; Y         | <i>kl-3*</i>                                  | No  |
|                 | 1993                   | Tc3{}2088; 2L      | <i>-*</i>                                     | Yes |
|                 | 2183                   | Tc3{}3768; 3R      | -                                             | Yes |
|                 | 2264                   | 22,749,005; 2L     | <i>CG40006*</i>                               | No  |
|                 | 2308                   | 2,048,629; 2R      | <i>CG17684*</i>                               | No  |
|                 | 2942                   | Tc3{}5138; 2R      | <i>Nipped-B*</i>                              | No  |
| <b>transib1</b> | 402                    | transib1{}4274; 2R | NTs hotspot*                                  | Yes |
|                 | 529, 740, 2310         | 6,481,813; 2R      | NTs hotspot                                   | No  |



|          |                      |                    |                        |     |
|----------|----------------------|--------------------|------------------------|-----|
| transib2 | 578                  | 3,144,932; 3R      | <i>Pzl*</i>            | No  |
|          | 611, 2905            | 3,140,380; 2R      | <i>dpr21*</i>          | No  |
|          | 646                  | 24,281,995; 3L     | <i>Snap25*</i>         | No  |
|          | 855                  | 494,613; Y         | <i>kl-3*</i>           | No  |
|          | 2005                 | 450,257; 3R        | _*                     | No  |
|          | 2479                 | Unresolvable       |                        |     |
|          | 2658                 | transib1{}4274; 2R | _*                     | Yes |
|          | 2873                 | 1,208,948; 3R      | <i>Myo81F*</i>         | No  |
|          | 2933                 | Unresolvable       |                        |     |
|          | 3135                 | 24,739,452; 3L     | <i>scro*</i>           | No  |
|          | 3175                 | 27,128,137; 3L     | _*                     | No  |
|          | 3497                 | 23,511,907; 2L     | _*                     | No  |
|          | 164, 236, 2444, 2445 | transib2{}2891; 3L | NTs hotspot*           | Yes |
|          | 202, 2733, 3524      | 27,466,293; 3L     | _*                     | No  |
|          |                      | 27,583,897; 3L     | _*                     | No  |
|          | 221, 2061            | transib2{}1003; 2R | -                      | Yes |
|          | 329, 2724            | 2,782,741; 2R      | <i>CG41378*</i>        | No  |
|          | 504                  | 1,964,060; 3R      | <i>Myo81F*</i>         | No  |
|          | 529, 740, 2310       | transib2{}754; 2R  | NTs hotspot            | Yes |
|          | 601, 2884            | transib2{}6602; 3L | _*                     | Yes |
|          | 756, 2461, 2462      | 26,667,964; 3L     | _*                     | No  |
|          | 808                  | transib2{}5064; 2R | NTs hotspot*           | Yes |
|          | 914                  | Most probably in Y |                        |     |
|          | 1117, 1125           | 68,418; 2R         | _*                     | No  |
|          | 1117                 | 73,644; 2R         | _*                     | No  |
|          |                      | 79,257; 2R         | _*                     | No  |
|          | 1158                 | transib2{}157; X   | <i>Bx</i>              | Yes |
|          | 1159                 | 23,286,743; X      | _*                     | No  |
|          | 1264                 | transib2{}259; X   | NTs hotspot*           | Yes |
|          | 1399                 | 541,878; Y         | <i>kl-3*</i>           | No  |
|          | 1993                 | transib2{}1578; 2L | NTs hotspot*           | Yes |
|          | 2096                 | 633,789; Y         | <i>kl-2*</i>           | No  |
|          | 2142, 2144           | 27,636,857; 3L     | _*                     | No  |
|          | 2173                 | 346,515; 2R        | <i>DIP-λ*</i>          | No  |
|          | 2308, 2430           | 1,877,936; 2R      | <i>CG17684*</i>        | No  |
|          | 2478                 | Unresolvable       |                        |     |
|          | 2524                 | 2,159,461; 3R      | <i>Myo81F*</i>         | No  |
|          | 2596                 | 2,544,661; 3L      | <i>lovit*</i>          | No  |
|          | 2609                 | transib2{}6603; Y  | _*                     | Yes |
|          | 2658                 | transib2{}3740; 2R | close to <i>Rpl38*</i> | Yes |
|          | 2830                 | 26,380,341; 3L     | _*                     | No  |
|          | 2887                 | transib2{}6601; 3L | _*                     | Yes |
|          | 2942, 3631           | transib2{}5058; 2R | <i>Nipped-B*</i>       | Yes |

|          |                      |                    |                                  |     |
|----------|----------------------|--------------------|----------------------------------|-----|
|          |                      |                    | NTs hotspot                      |     |
|          | 3002                 |                    | Unresolvable                     |     |
| transib3 | 3193                 | 23,008,563; 2L     | <i>Cht10*</i>                    | No  |
|          | 3306                 | transib2{}671; 2R  | <i>CG30440*</i>                  | Yes |
|          | 3387                 | 360,528; Y         | <i>kl-3*</i>                     | No  |
|          | 3501                 | 1,553,097; Y       | _*                               | No  |
|          | 3602                 | transib2{}1688; 2L | NTs hotspot                      | Yes |
|          | 3753                 |                    | Most probably in Y               |     |
|          | 93, 2266, 3389, 3390 | 22,667,207; 2L     | <i>CG40006*</i>                  | No  |
|          | 164, 2445            | transib3{}2951; 3L | invader2{}2886,<br>Doc{}2376*    | Yes |
|          | 512, 2183            | transib3{}1202; 3R | -                                | Yes |
|          | 578                  | 3,119,987; 3R      | <i>Pzl*</i>                      | No  |
|          | 585                  | 2,275,172; 3R      | <i>Myo81F*</i>                   | No  |
|          | 673                  | 2,609,128; 3R      | <i>Pzl*</i>                      | No  |
|          | 771                  | transib3{}4416; X  | _*                               | Yes |
|          | 904, 1017            | transib3{}2950; 3L | _*                               | Yes |
|          | 1017                 | transib3{}2949; 3L | <i>AGO3*</i>                     | Yes |
|          | 1993                 | transib3{}567; 2L  | <i>Marf1*,</i><br>invader5{}1644 | Yes |
|          | 2009, 3172           | 2,519,371; 2R      | <i>MFS17*</i>                    | No  |
|          | 2264, 2265, 3391     | 22,684,559; 2L     | <i>CG40006*</i>                  | No  |
|          | 2293                 | 1,835,441; 3R      | <i>Myo81F*</i>                   | No  |
|          | 2429                 | 584,669; Y         | <i>kl-2*</i>                     | No  |
| transib4 | 2455                 | transib3{}1705; 4  | <i>Syt7</i><br>NTs hotspot       | Yes |
|          | 2615, 3212           | transib3{}1112; 3L | _*                               | Yes |
|          | 2873                 | 1,144,915; 3R      | <i>Myo81F*</i>                   | Yes |
|          | 2908                 | 2,612,008; 3R      | <i>Myo81F*</i>                   | Yes |
|          | 3161                 | 3,291,506; 3R      | _*                               | Yes |
|          | 3306                 | transib3{}670; 2R  | <i>CG30440*</i>                  | Yes |
|          | 3755                 | 3,309,826; 3R      | _*                               | No  |
|          | 3758                 | 3,296,524; 3R      | _*                               | No  |
|          | 996                  | transib4{}75; X    | -                                | Yes |
|          | 1264                 | transib4{}251; X   | _*                               | Yes |
|          | 1993                 | transib4{}1579; 2L | diver2{}2295*                    | Yes |
|          | 2052                 | 1,528,843; 3R      | <i>Myo81F*</i>                   | No  |
|          | 2189                 |                    | Unresolvable                     |     |
|          | 2287                 | transib4{}623; 2R  | _*                               | Yes |
|          | 2293                 |                    | Unresolvable                     |     |
|          | 2658                 | transib4{}3834; 2R | <i>Stlk*</i>                     | Yes |
|          |                      | transib4{}3815; 2R | _*                               | Yes |
|          | 3375                 | 2,880,264; 3R      | <i>Pzl*</i>                      | No  |
|          | 3692                 |                    | Most probably in X               |     |
