# Supplementary material for: The Landscape of the DNA Transposons in the Genome of the Horezu_LaPeri Strain of Drosophila melanogaster
Source: MDPI journal article supplement (doi:10.3390/insects14060494), 2023-05-25
Supplement: s1 [file s1]

**Supplementary Table S1.** Sequences of primers used in PCR to validate the presence of P elements in Horezu\_LaPeri genome. The sequence of MM11 primer is: CGACGGGACCACCTTATGTTATTTC.

| Primer pairs | Genomic region              | Sequence from 5' to 3'  | Expected PCR product size (bp) |
|--------------|-----------------------------|-------------------------|--------------------------------|
| P1 + MM11    | <i>ebd2</i> , CG32436       | AGGGATTGAGCATAGTGAACCG  | 121                            |
| P2 + MM11    | <i>Glut1</i>                | ATGCTTACTGACAGAGTGAGCG  | 128                            |
| P3 + MM11    | close to <i>stv</i>         | GGCGGTTTCAGACCTTAATTGG  | 156                            |
| P4 + MM11    | <i>lncRNA:CR45233</i>       | AACCGCTCAAACCTTGTTTTCCA | 295                            |
| P5 + MM11    | <i>lncRNA:CR43626</i>       | TGTTTCATGTTTGATCTGCTGCC | 379                            |
| P6 + MM11    | <i>NEAT</i>                 | TAGACCGTAGTTCGTAAGTCGC  | 410                            |
| P7 + MM11    | <i>Ac13E</i>                | GACTGCCAATTGTGGAATACCC  | 426                            |
| P8 + MM11    | <i>spri</i>                 | CAACATCCACTATGCACTCTGC  | 646                            |
| P9 + MM11    | close to CG43658            | ATCACTTTCAAAACGGTGCAGG  | 738                            |
| P10 + MM11   | <i>retn</i>                 | GACCGACCCAAATGATTTCTGC  | 742                            |
| P11 + MM11   | gypsy5{}103                 | GTCTAATTCTGGGTGGTAGGGC  | 797                            |
| P12 + MM11   | <i>Cyp6g2</i>               | CCGTTCTACGACTACACTCTCG  | 873                            |
| P13+ MM11    | CG7991                      | TCAATTGAATGCCCTCAAAGCG  | 893                            |
| P14 + MM11   | <i>nolo</i>                 | TGACAACATGGGTCTCCACC    | 903                            |
| P15 + MM11   | close to CG5555,<br>CG31475 | TAAGACCTTTGGTCACCTCGAC  | 924                            |
