# Supplementary material for: The Landscape of the DNA Transposons in the Genome of the Horezu_LaPeri Strain of Drosophila melanogaster
Source: Insects. 2023 May 25;14(6):494. doi: 10.3390/insects14060494 (PMC10299278; doi:10.3390/insects14060494)
Supplement: Supplementary file 1 [file insects-14-00494-s001.zip]

Archive with 5 entries (5 files):
- Suppl_Figure_S1.pdf
- Suppl_Table_S1.pdf
- Suppl_Table_S2.pdf
- Suppl_Table_S3.pdf
- Suppl_Table_S4.pdf
